# Supplementary material for: An interface-modulating spin-valley electron beam splitter and perfect spin-valley filter in a topological–insulator junction
Source: Royal Society of Chemistry journal article supplement (doi:10.1039/d4cp03630a), 2024-12-16
Supplement: d4cp03630a1.pdf [file d4cp03630a1.pdf]

# Interface-modulating spin-valley electron beam splitter and perfect spin-valley filter in topological-insulator junction

Jia-En Yang<sup>1,2\*</sup>

<sup>1</sup>*School of Electronics and IoT, Chongqing Polytechnic University of Electronic Technology, Chongqing, China*

<sup>2</sup>*College of Physics, Chongqing University, Chongqing, China*

## Supplementary Information

As shown in Figure S1, the transmittance of the spin-up current from Lead 1 to Lead 3 increases as the value of  $X$  decreases. When  $X$  is  $-5$ , the spin-up current nearly reaches 100% transmission. This is slightly different from the perfect 100% transmission observed when  $X$  is  $5$ , which can be attributed to the higher concentration at the upper interface, as demonstrated in Figure 2(c) of the main text.

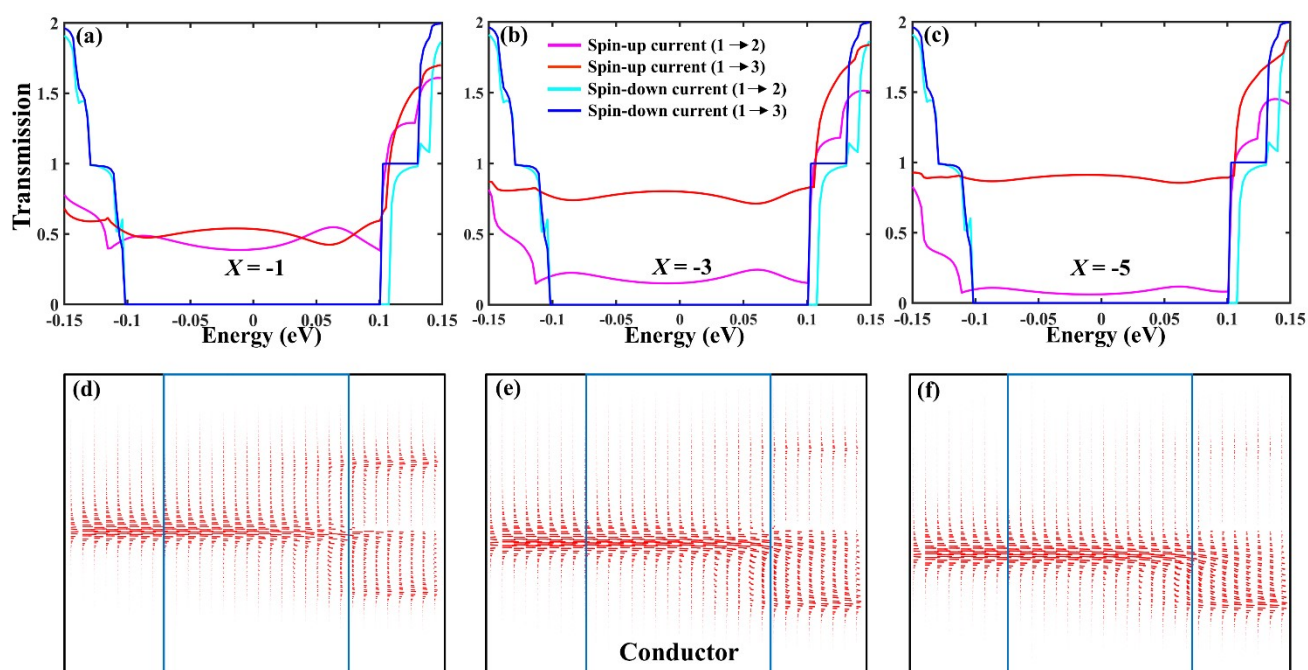

**Fig. S1.** The transmission spectra and local current distribution with varying interface positions. (a) Transmission spectrum for (a)  $X = -1$ , (b)  $X = -3$ , (c)  $X = -5$ . (b) Local bond current ( $E = 0.005$  eV) for (d)  $X = -1$ , (e)  $X = -3$ , (f)  $X = -5$ . Red and blue indicate the spin-up and spin-down, respectively. The constants are the same as in Fig. 1.
